# Supplementary material
Source: PubMed Central journal article supplement (PMC2860454)

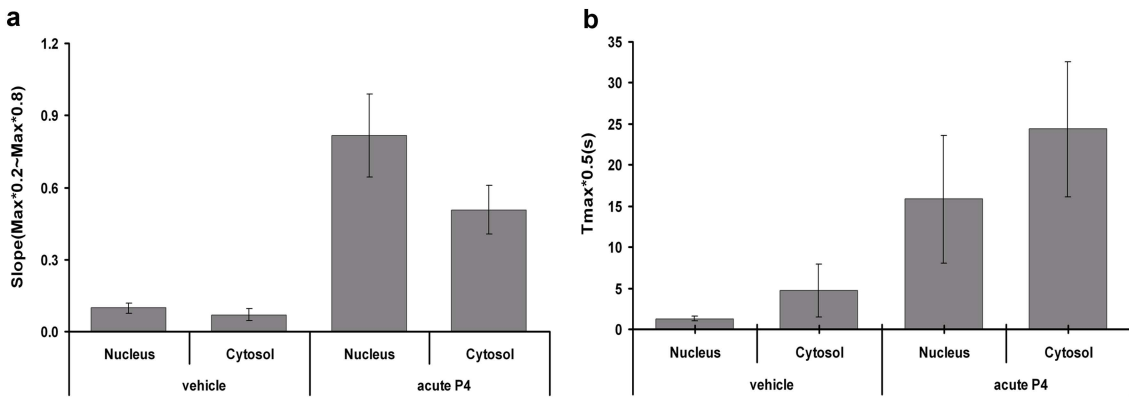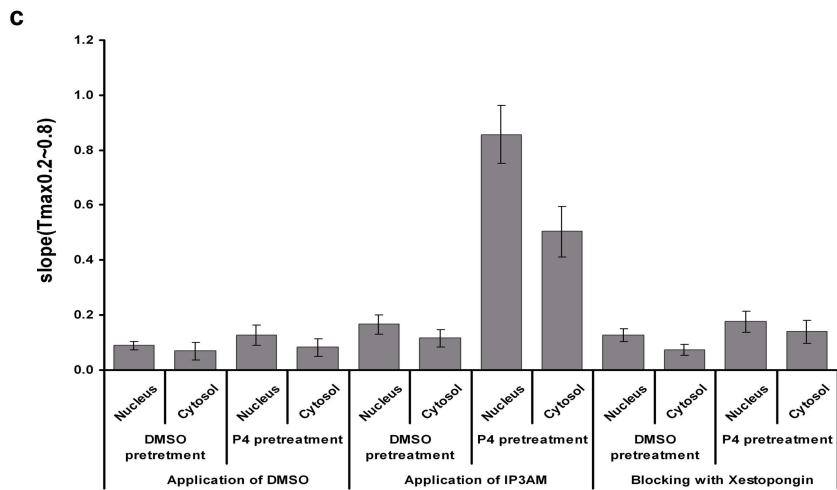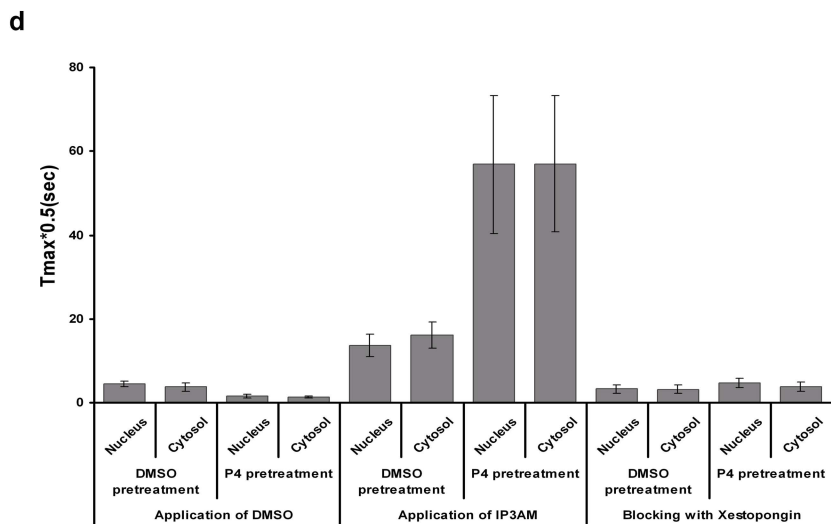

Supplemental Figure 1

Supplement: NIHMS185286-supplement-Figure.pdf [file NIHMS185286-supplement-Figure.pdf]
